# Supplementary material
Source: PubMed Central journal article supplement (PMC1851578)

**A.**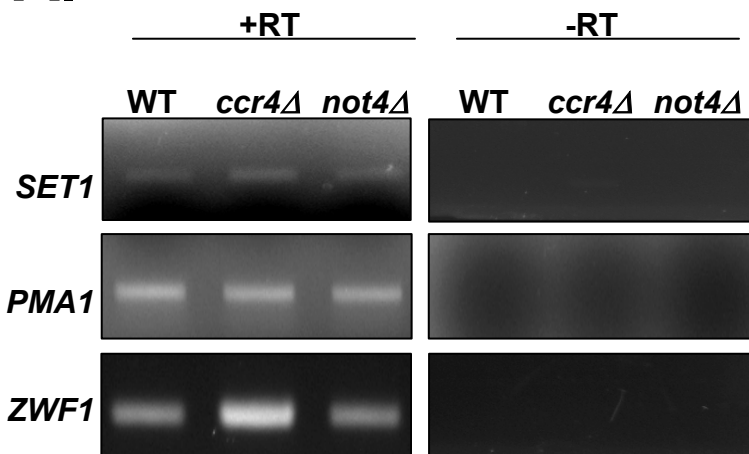**B.**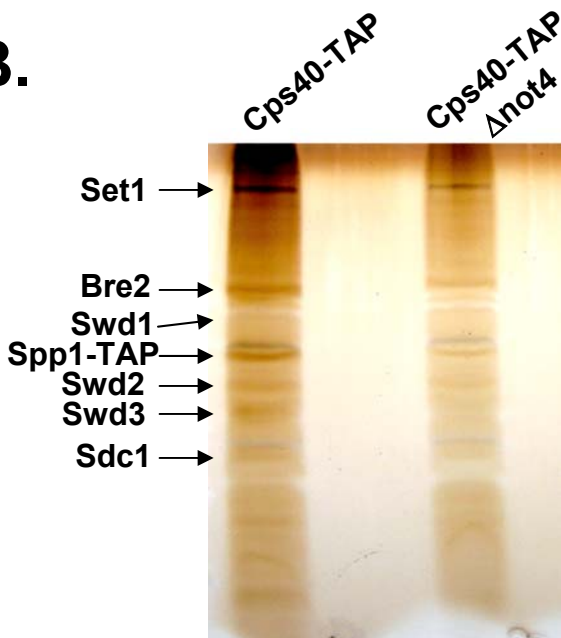

Supplement: pnas_0607996104_1.pdf [file pnas_0607996104_1.pdf]

**A.**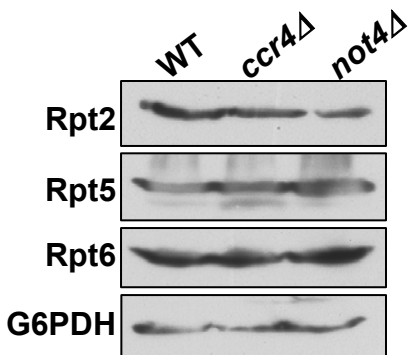**B.**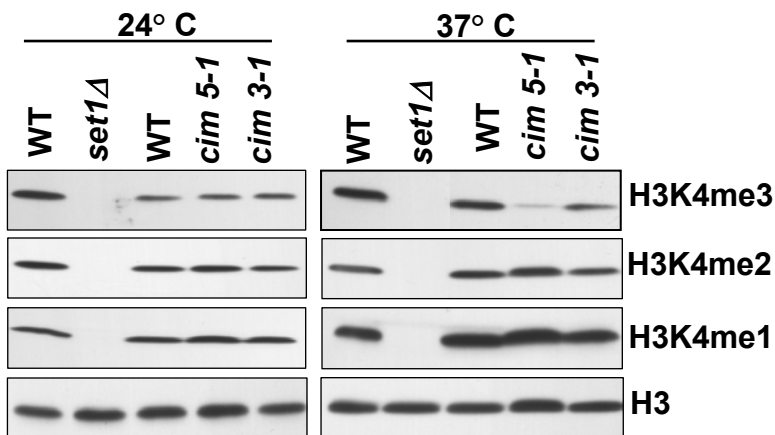

Supplement: pnas_0607996104_2.pdf [file pnas_0607996104_2.pdf]

# A.

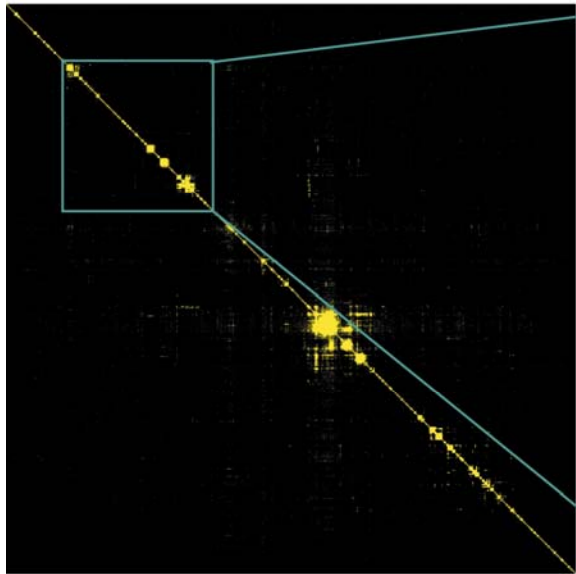

# B.

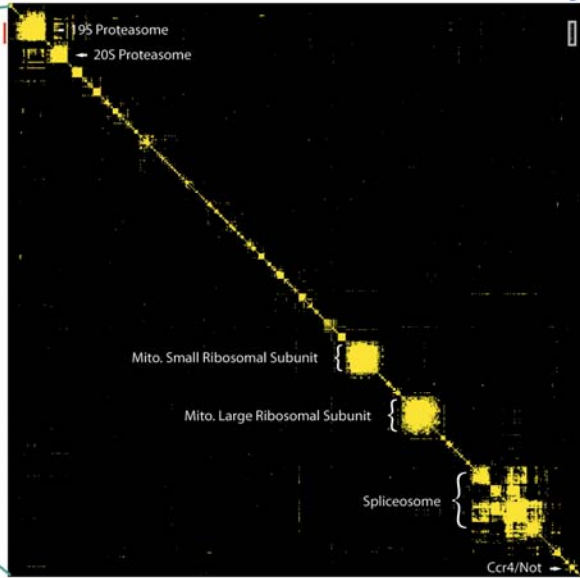

Supplement: pnas_0607996104_3.pdf [file pnas_0607996104_3.pdf]
